# Supplementary material
Source: Springer Nature journal article supplement (https://www.springermedizin.de/resource/supplementary/12891_2012_2088_MOESM3_ESM.pdf/9509388)

L2

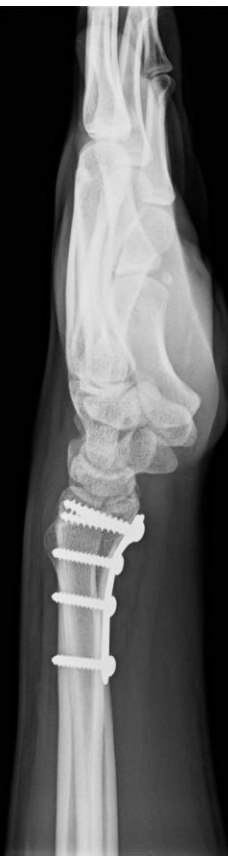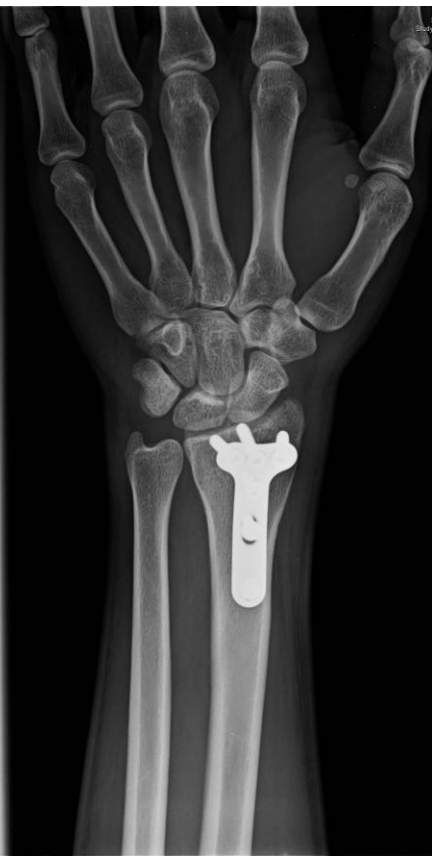

Study Date: 2013/04/10  
Study Time: 上午 10:30

Supplement: MOESM3 [file 9509388]
